# Supplementary material for: Leveraging human genomic information to identify nonhuman primate sequences for expression array development
Source: PubMed Central journal article supplement (PMC1314899; doi:10.1186/1471-2164-6-160), 2005-11-15

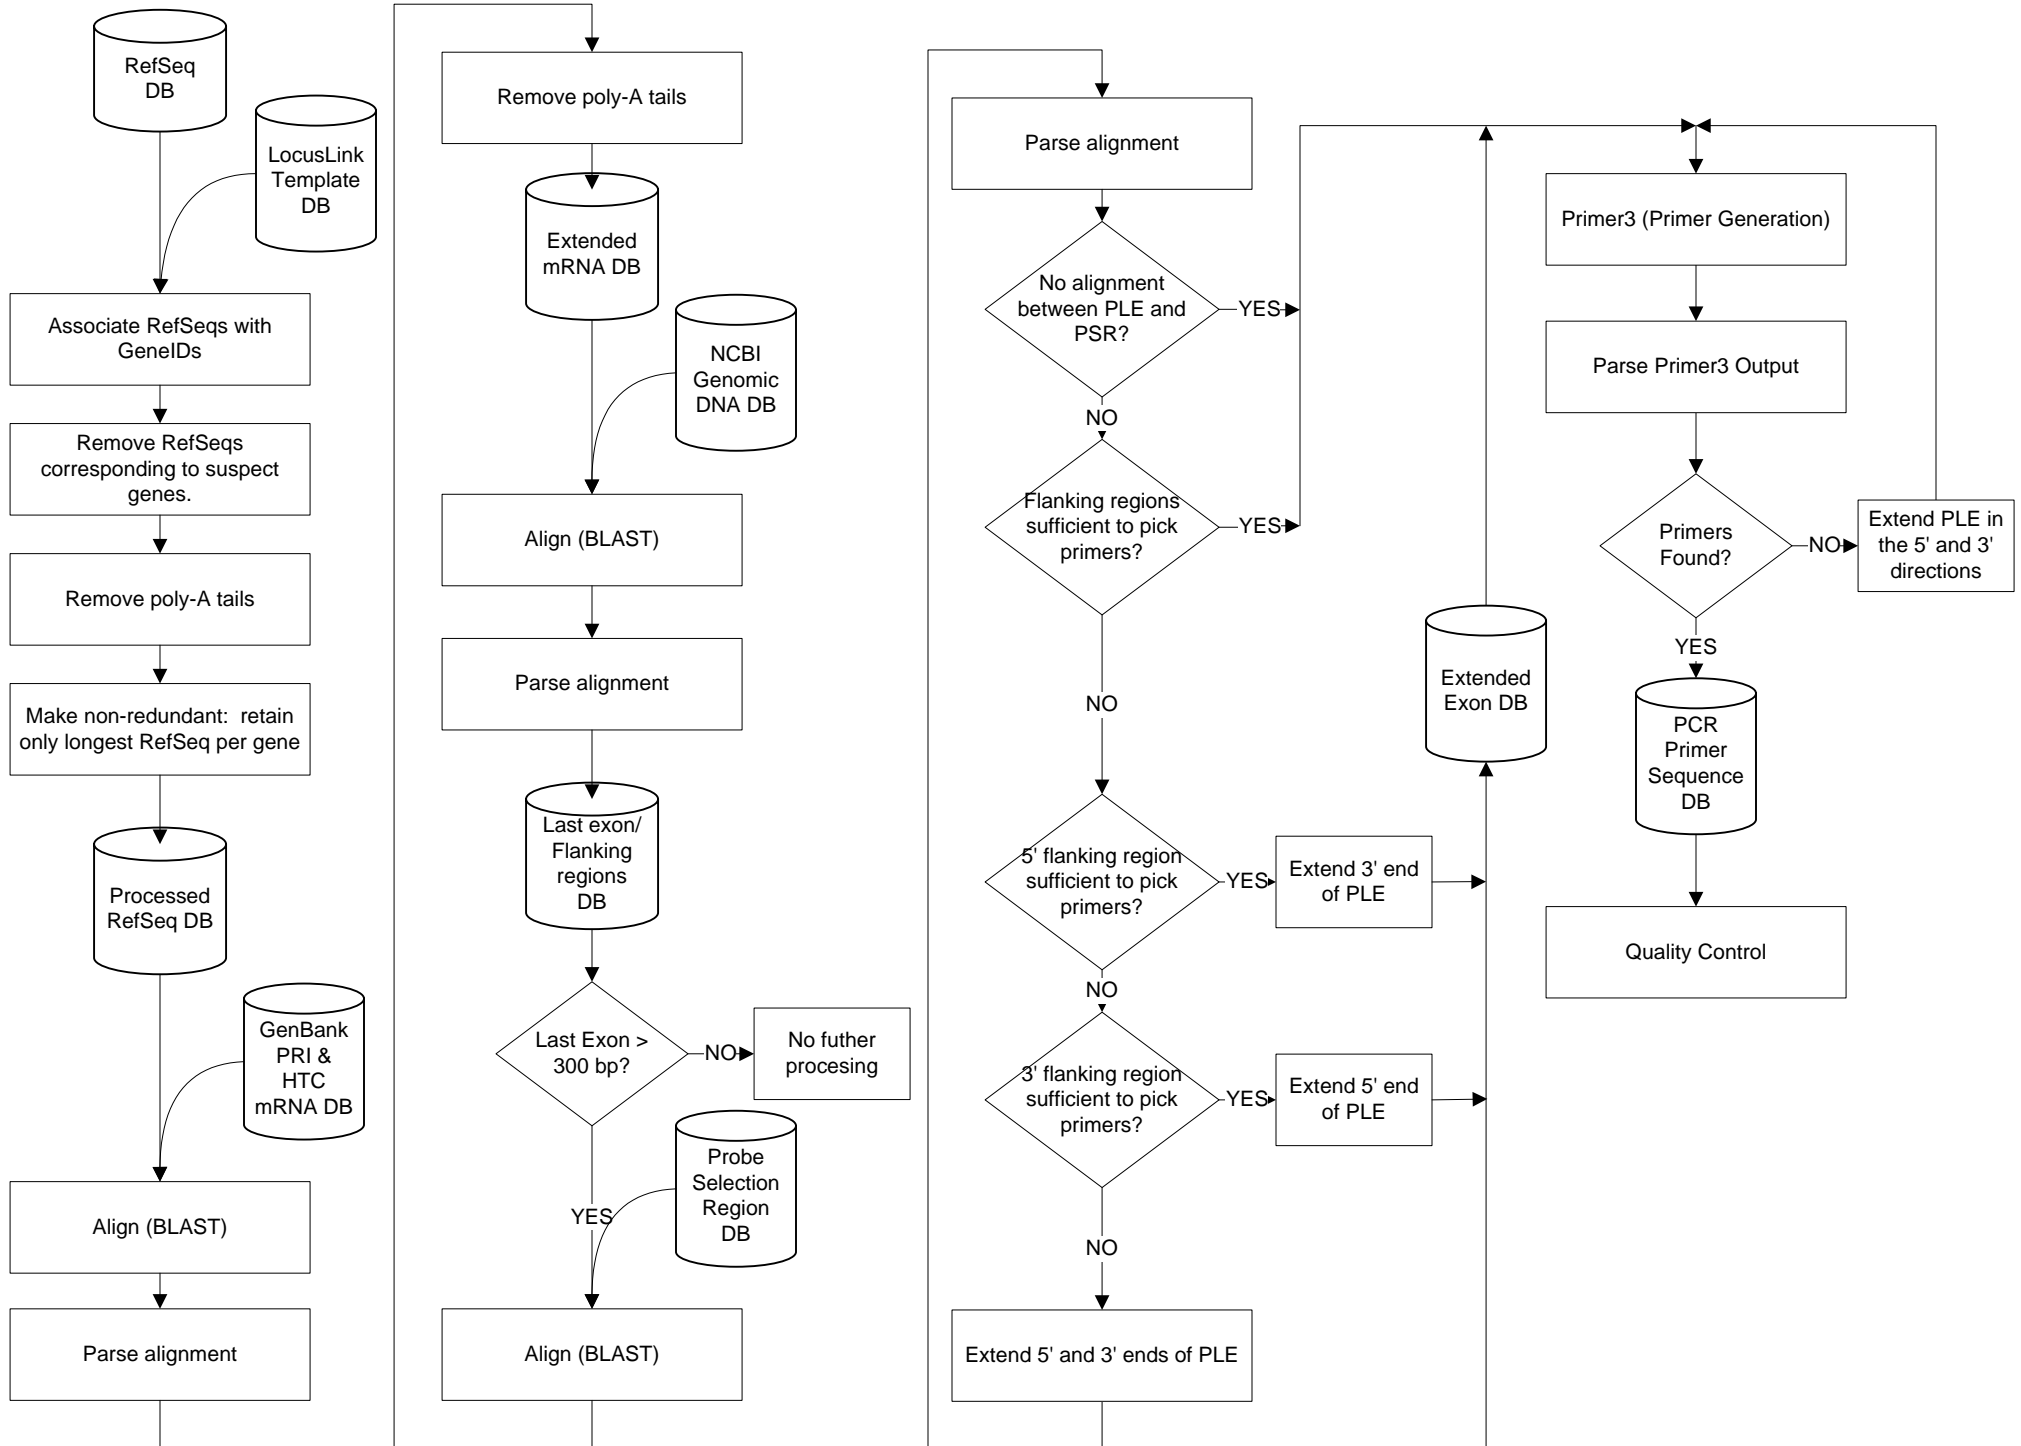

Supplement: 1471-2164-6-160-S4.pdf [file 1471-2164-6-160-S4.pdf]
